# Supplementary material for: Rapid analysis of 90Sr in cattle bone and tooth samples by inductively coupled plasma mass spectrometry
Source: Royal Society of Chemistry journal article supplement (doi:10.1039/d1ja00086a), 2021-01-01
Supplement: d1ja00086a1.pdf [file d1ja00086a1.pdf]

Electronic supplementary information

Rapid analysis of  $^{90}\text{Sr}$  in cattle bone and tooth samples by inductively coupled plasma mass spectrometry  
Kazuma Koarai,<sup>a</sup> Makoto Matsued,<sup>a,b</sup> Jo Aoki,<sup>a,b</sup> Kayo Yanagisawa,<sup>b</sup> Motoki Terashima,<sup>a</sup> Kenso Fujiwara,<sup>a</sup> Yasushi Kino,<sup>c</sup> Toshitaka Oka,<sup>d</sup> Atsushi Takahashi,<sup>e</sup> Toshihiko Suzuki,<sup>f</sup> Yoshinaka Shimizu,<sup>f</sup> Mirei Chiba,<sup>f</sup> Ken Osaka,<sup>f</sup> Keiichi Sasaki,<sup>f</sup> Tsutomu Sekine,<sup>c,g</sup> Manabu Fukumoto,<sup>h</sup> Hisashi Shinoda,<sup>f</sup> Akihiro Kitamura,<sup>i</sup> And Hironobu Abe<sup>a</sup>

- <sup>a.</sup> Collaborative Laboratories for Advanced Decommissioning Science, Sector of Fukushima Research and Development, Japan Atomic Energy Agency (JAEA), 10-2 Fukasaku, Miharu, Fukushima, 963-7700, Japan
- <sup>b.</sup> Cluster of Science and Technology, Fukushima University, 1 Kanayagawa, Fukushima 960-1296, Japan
- <sup>c.</sup> Faculty Department of Chemistry, Tohoku University, 6-3 Aramaki-aoba, Aoba-ku, Sendai, Miyagi, 980-8578, Japan
- <sup>d.</sup> Sector of Nuclear Science Research, Japan Atomic Energy Agency, 2-4 Shirakata, Tokai, Naka, Ibaraki, 319-1195, Japan
- <sup>e.</sup> Tohoku University Hospital, Tohoku University, 1-1 Seiryomachi, Aoba-ku, Sendai, Miyagi, 980-8574, Japan
- <sup>f.</sup> Graduate School of Dentistry, Tohoku University, 4-1 Seiryomachi, Aoba-ku, Sendai, Miyagi, 980-8575, Japan
- <sup>g.</sup> Institute for Excellence in Higher Education, Tohoku University, 41 Kawauchi, Aoba-ku, Sendai, Miyagi, 980-8576, Japan
- <sup>h.</sup> RIKEN Center for Advanced Intelligence Project, Institute of Physical and Chemical Research (RIKEN), Nihonbashi 1-chome Mitsui Building, 15<sup>th</sup> floor, 1-4-1 Nihonbashi, Chuo-ku, Tokyo 103-0027, Japan
- <sup>i.</sup> Naraha Center for Remote Control Technology Development, Sector of Fukushima Research and Development, Japan Atomic Energy Agency (JAEA), 1-22 Nakamaru, Yamadaoka, Naraha, Fukushima, 979-0513, Japan

Table S1. ICP-MS instrumental parameters and condition for elemental analysis

| Parameter          | Value                                                                                                                                                                                      |
|--------------------|--------------------------------------------------------------------------------------------------------------------------------------------------------------------------------------------|
| Nebulizer          | MEINHARD glass nebulizer with<br>standard baffled cyclonic spray chamber                                                                                                                   |
| RF power           | 1600 W                                                                                                                                                                                     |
| Plasma gas flow    | 18 L min <sup>-1</sup>                                                                                                                                                                     |
| Aux. gas flow      | 1.1 L min <sup>-1</sup>                                                                                                                                                                    |
| Nebulizer gas flow | 0.95 L min <sup>-1</sup>                                                                                                                                                                   |
| Sample uptake rate | 500 µL min <sup>-1</sup>                                                                                                                                                                   |
| Isotopes monitored | <sup>24</sup> Mg, <sup>88</sup> Sr, <sup>90</sup> Zr, <sup>115</sup> In (no gas mode)<br><sup>40</sup> Ca, <sup>56</sup> Fe, <sup>73</sup> Ge, <sup>60</sup> Ni (Methane reaction<br>mode) |
| Scan mode          | Peak hopping                                                                                                                                                                               |
| Dwell time         | 1.0 msec amu <sup>-1</sup>                                                                                                                                                                 |
| Cell gas           | Methane                                                                                                                                                                                    |
| Cell gas flow      | 1.2 mL min <sup>-1</sup>                                                                                                                                                                   |
| DRC RPq            | 0.75                                                                                                                                                                                       |
| Detector mode      | Dual mode (Plus + Analog)                                                                                                                                                                  |
| Auto lens          | ON                                                                                                                                                                                         |

Table S2. ICP-MS instrumental parameters and condition for <sup>90</sup>Sr measurement

| Parameter           | Value                                                                                                                                  |
|---------------------|----------------------------------------------------------------------------------------------------------------------------------------|
| Nebulizer           | Ultrasonic desolvating nebulizer                                                                                                       |
| Nebulizer condition | 120 °C for desolvation<br>2 °C for condensation                                                                                        |
| RF power            | 1600 W                                                                                                                                 |
| Plasma gas flow     | 18 L min <sup>-1</sup>                                                                                                                 |
| Aux. gas flow       | 1.1 L min <sup>-1</sup>                                                                                                                |
| Nebulizer gas flow  | 1.01 L min <sup>-1</sup>                                                                                                               |
| Sample uptake rate  | 550 µL min <sup>-1</sup>                                                                                                               |
| Isotopes monitored  | <sup>84</sup> Sr, <sup>86</sup> Sr, <sup>89</sup> Y, <sup>90</sup> Sr, <sup>115</sup> In                                               |
| Scan mode           | Peak hopping                                                                                                                           |
| Dwell time          | 10 msec amu <sup>-1</sup> (m/z = 89 and 90)<br>1.0 msec min <sup>-1</sup> (m/z = 115)<br>0.10 msec min <sup>-1</sup> (m/z = 84 and 86) |
| Cell gas            | Oxygen                                                                                                                                 |
| Cell gas flow       | 1.2 mL min <sup>-1</sup>                                                                                                               |
| DRC RPq             | 0.75                                                                                                                                   |
| Detector mode       | Dual mode (Plus + Analog)                                                                                                              |
| Auto lens           | ON                                                                                                                                     |

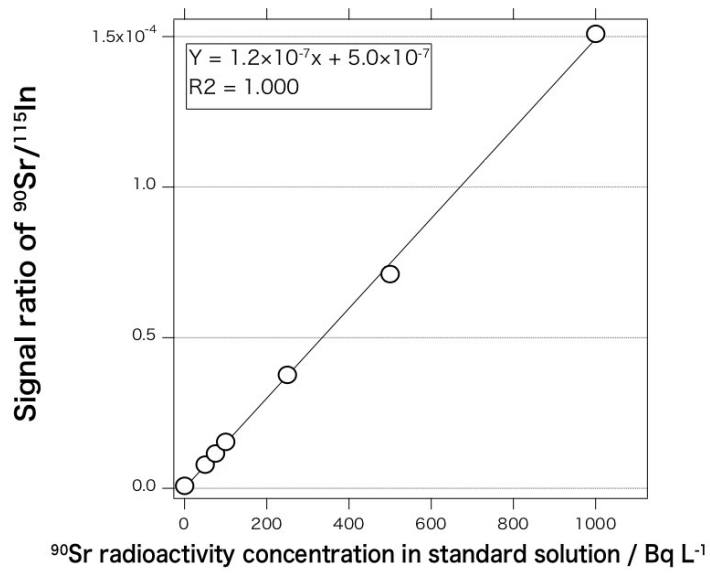

Fig. S1. Calibration curve of radioactive concentration of  $^{90}\text{Sr}$  in the ICP-MS method. Where error bars are not visible, they are smaller than symbols.

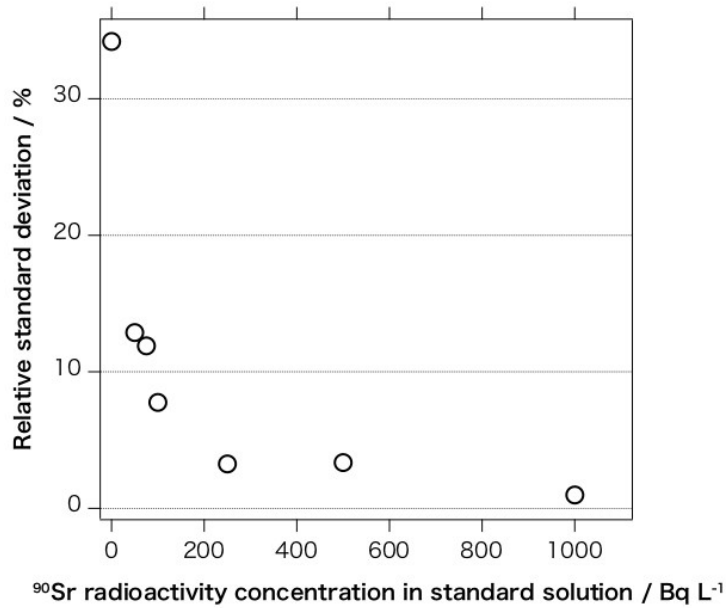

Fig. S2. Relationship between RSD and radioactive concentration of  $^{90}\text{Sr}$  in the standard solution
